# Supplementary material for: Hydrate formation and its effects on the thermal expansion properties of HfMgW3O12
Source: Royal Society of Chemistry journal article supplement (doi:10.1039/d0cp01446j), 2020-01-01
Supplement: d0cp01446j1.pdf [file d0cp01446j1.pdf]

supplementary information

## Hydrate formation and its effects on the thermal expansion properties of $\text{HfMgW}_3\text{O}_{12}$

Gaojie Zeng,<sup>a</sup> Huanli Yuan,<sup>a</sup> Juan Guo,<sup>a</sup> Qiang Sun,<sup>a</sup> Qilong Gao,<sup>a</sup> Mingju Chao,<sup>a</sup> Xiao Ren<sup>\*a</sup> and Erjun Liang<sup>\*a</sup>

<sup>a</sup> School of Physics & Microelectronics, and Key Laboratory of Materials Physics of Ministry of Education of China, Zhengzhou University, Zhengzhou 450052, China  
E-mail: ejliang@zzu.edu.cn; rxphy@zzu.edu.cn

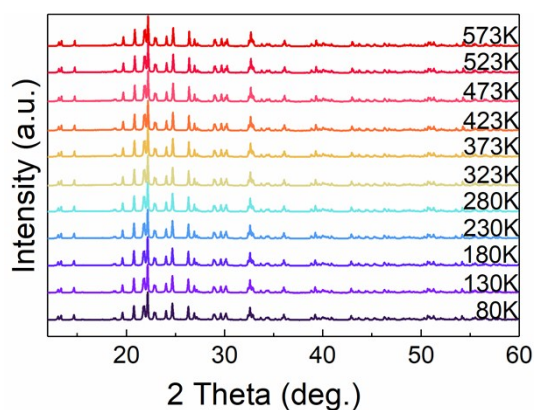

Fig. S1 Temperature dependent XRD patterns of dehydrated  $\text{HfMgW}_3\text{O}_{12}$ .

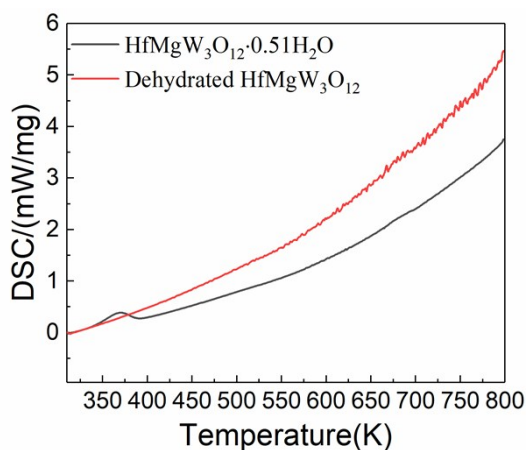

Fig. S2 DSC plots of  $\text{HfMgW}_3\text{O}_{12}\cdot 0.51\text{H}_2\text{O}$  and dehydrated  $\text{HfMgW}_3\text{O}_{12}$ .

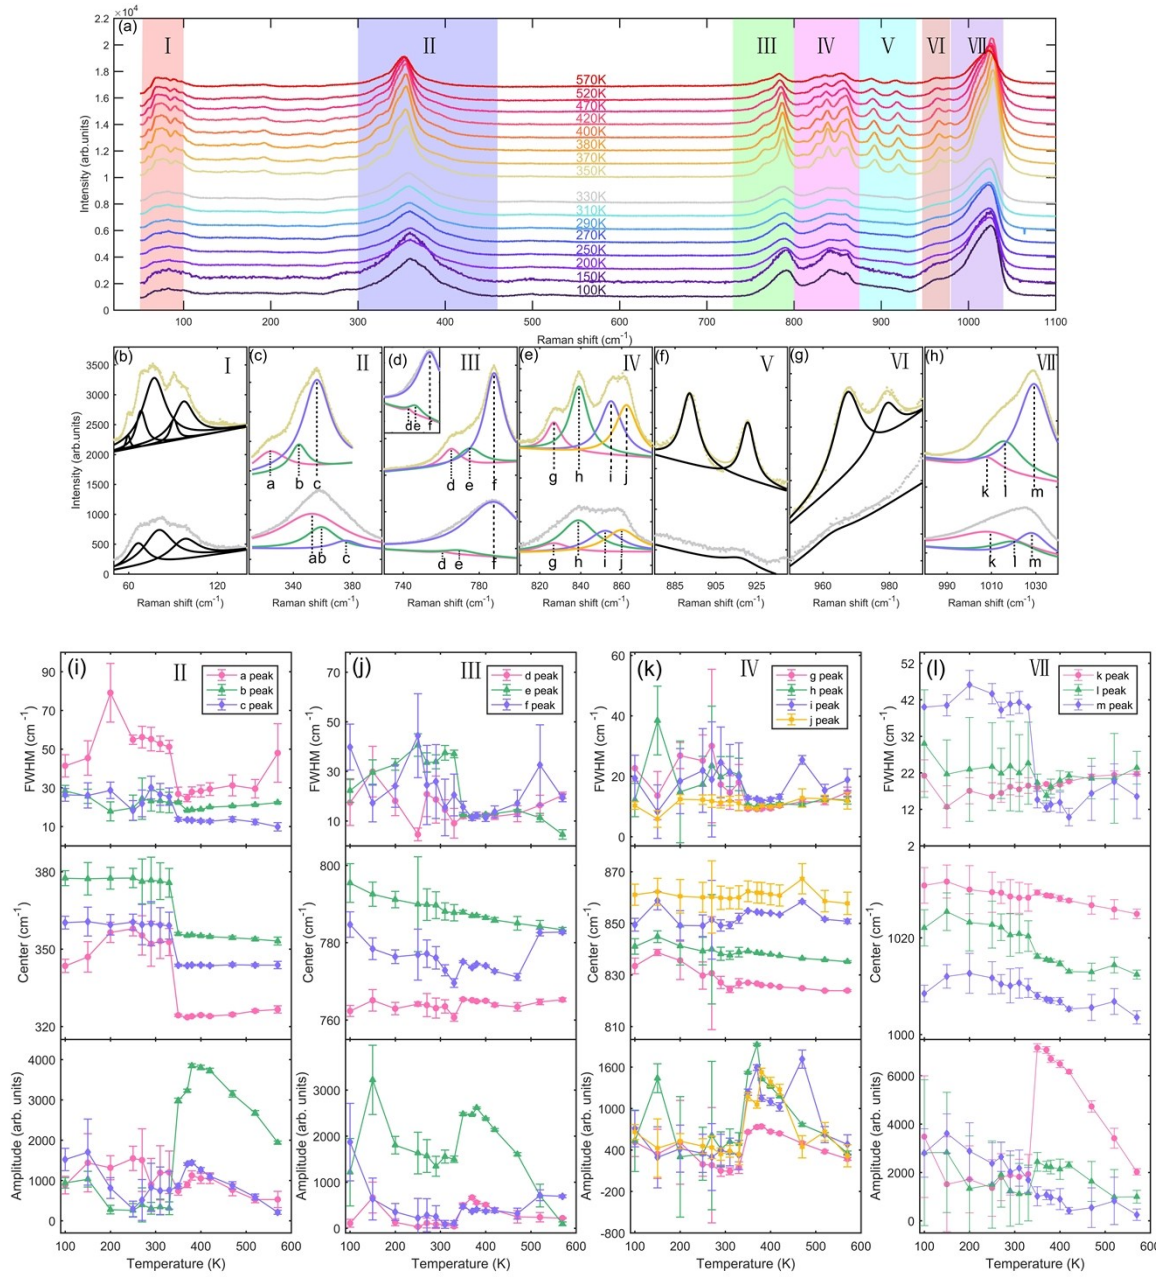

**Fig. S3** Analysis of the temperature dependent Raman spectra of  $\text{HfMgW}_3\text{O}_{12}$ : (a) Raman spectra at different temperatures; (b), (c), (d), (e), (f), (g), (h) deconvolutions of the Raman modes at 330 K and 350 K in different regions by Lorentzian fitting; (h), (i), (j), (k) Full width at half maximum (FWHM, First row), peak positions (2<sup>nd</sup> row) and amplitude (3<sup>rd</sup> row) varying with temperature in regions of II, III, IV, VII, respectively .

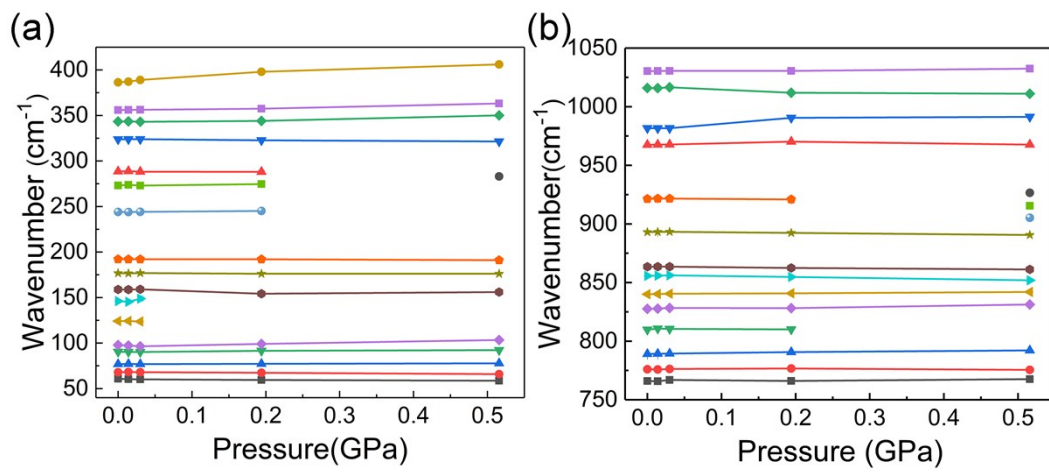

**Fig. S4**  $\text{HfMgW}_3\text{O}_{12}$  (a) low wavenumber and (b) high wave number mode frequencies of the various Raman modes at different pressure

**Table S1** Atomic positions and occupations in HfMgW<sub>3</sub>O<sub>12</sub>

| Atom | x            | y           | z           | B         | occ. |
|------|--------------|-------------|-------------|-----------|------|
| Hf1  | 0.03224(2)   | 0.49820(4)  | 0.61646(3)  | 0.336(1)  | 1    |
| Mg1  | 0.46656(20)  | 0.49823(32) | 0.37885(16) | 0.284(31) | 1    |
| W1   | 0.74791(3)   | 0.27705(1)  | 0.49040(3)  | 0.295(2)  | 1    |
| W2   | 0.12328(2)   | 0.65300(2)  | 0.35448(2)  | 0.227(2)  | 1    |
| W3   | 0.61103(2)   | 0.36350(2)  | 0.14293(0)  | 0.303(1)  | 1    |
| O1   | 0.08839(38)  | 0.83577(42) | 0.34841(34) | 0.962(71) | 1    |
| O2   | 0.87121(43)  | 0.38910(43) | 0.54846(26) | 1.041(76) | 1    |
| O3   | 0.01896(42)  | 0.57784(44) | 0.25879(33) | 1.318(81) | 1    |
| O4   | 0.32587(39)  | 0.31998(46) | 0.40408(33) | 1.203(80) | 1    |
| O5   | 0.07719(40)  | 0.58259(42) | 0.47292(33) | 1.114(59) | 1    |
| O6   | 0.30617(39)  | 0.62166(42) | 0.33342(34) | 1.549(85) | 1    |
| O7   | 0.50443(41)  | 0.43465(43) | 0.23497(30) | 1.235(83) | 1    |
| O8   | 0.57029(39)  | 0.44213(42) | 0.03010(30) | 0.942(79) | 1    |
| O9   | 0.15359(39)  | 0.33888(45) | 0.58141(33) | 0.926(74) | 1    |
| O10  | 0.63594(41)  | 0.37356(41) | 0.41935(26) | 1.445(82) | 1    |
| O11  | 0.21422(37)  | 0.59986(37) | 0.66605(30) | 0.367(68) | 1    |
| O12  | -0.09311(40) | 0.68092(38) | 0.63469(35) | 1.216(75) | 1    |

**Table S2** Bond Lengths of HfMgW<sub>3</sub>O<sub>12</sub>

| Bond length type | Bond Length |
|------------------|-------------|
| Hf1-O2           | 2.067(4) Å  |
| Hf1-O3           | 2.075(4) Å  |
| Hf1-O5           | 2.105(4) Å  |
| Hf1-O9           | 1.967(5) Å  |
| Hf1-O11          | 2.102(4) Å  |
| Hf1-O12          | 2.128(4) Å  |
| Mg1-O1           | 2.005(5) Å  |
| Mg1-O4           | 2.193(6) Å  |
| Mg1-O6           | 2.027(5) Å  |
| Mg1-O8           | 2.108(5) Å  |
| Mg1-O10          | 2.081(5) Å  |
| W1-O2            | 1.768(4) Å  |
| W1-O4            | 1.647(5) Å  |
| W1-O9            | 1.866(5) Å  |
| W1-O10           | 1.698(4) Å  |
| W2-O1            | 1.773(4) Å  |
| W2-O3            | 1.765(4) Å  |
| W2-O5            | 1.759(4) Å  |
| W2-O6            | 1.803(4) Å  |
| W3-O7            | 1.728(4) Å  |
| W3-O8            | 1.714(4) Å  |
| W3-O11           | 1.741(4) Å  |
| W3-O12           | 1.748(4) Å  |

**Table S3** Bond angles of HfMgW<sub>3</sub>O<sub>12</sub>

| Bond Angle type | Bond Angle   |
|-----------------|--------------|
| Hf1-O2-W1       | 172.7(3) deg |
| Hf1-O3-W2       | 157.8(3) deg |
| Hf1-O9-W1       | 153.4(3) deg |
| Hf1-O5-W2       | 177.3(3) deg |
| Hf1-O11-W3      | 147.0(3) deg |
| Mg1-O1-W2       | 150.9(3) deg |
| Mg1-O4-W1       | 144.9(3) deg |
| Mg1-O6-W2       | 142.2(3) deg |
| Mg1-O7-W3       | 152.0(3) deg |
| Mg1-O8-W3       | 168.9(3) deg |
| Mg1-O10-W1      | 160.9(3) deg |

**Table S4** Mode frequencies and Grüneisen parameters in the Orthorhombic and monoclinic structure of  $\text{HfMgW}_3\text{O}_{12}$

| Orthorhombic Phase                |                                              |            | Monoclinic phase                  |                                              |            | Assignment                                                        |                                                   |
|-----------------------------------|----------------------------------------------|------------|-----------------------------------|----------------------------------------------|------------|-------------------------------------------------------------------|---------------------------------------------------|
| Mode frequency / $\text{cm}^{-1}$ | $d\omega_i/dP / (\text{cm}^{-1}/\text{GPa})$ | $\gamma_i$ | Mode frequency / $\text{cm}^{-1}$ | $d\omega_i/dP / (\text{cm}^{-1}/\text{GPa})$ | $\gamma_i$ |                                                                   |                                                   |
| 61                                | -18.86                                       | -17.65     | 59                                | 1.77                                         | 1.63       | Translational and librational motions of $\text{WO}_4$ tetrahedra |                                                   |
| 68                                | 4.55                                         | 3.80       | 67                                | -2.15                                        | -1.72      |                                                                   |                                                   |
| 77                                | -1.03                                        | -0.76      | 77                                | 3.69                                         | 2.59       |                                                                   |                                                   |
| 90                                | -6.91                                        | -4.35      | 91                                | 2.42                                         | 1.44       |                                                                   |                                                   |
| 98                                | -45.05                                       | -26.15     | 99                                | 3.83                                         | 2.08       |                                                                   |                                                   |
| 124                               | -10.08                                       | -4.61      |                                   |                                              |            |                                                                   |                                                   |
| 146                               | -21.97                                       | -8.55      |                                   |                                              |            |                                                                   |                                                   |
| 159                               | 3.57                                         | 1.28       |                                   |                                              |            |                                                                   |                                                   |
| 177                               | -0.63                                        | -0.20      |                                   |                                              |            |                                                                   |                                                   |
| 192                               | -5.46                                        | -1.62      |                                   |                                              |            |                                                                   |                                                   |
| 241                               | -45.40                                       | -10.71     |                                   |                                              |            | Bending vibrations of $\text{WO}_4$ tetrahedra                    |                                                   |
| 273                               | 0.95                                         | 0.20       |                                   |                                              |            |                                                                   |                                                   |
| 289                               | -10.02                                       | -1.97      |                                   |                                              |            |                                                                   |                                                   |
| 324                               | 2.85                                         | 0.50       | 318                               | 6.54                                         | 1.11       |                                                                   |                                                   |
| 343                               | -9.54                                        | -1.58      | 344                               | 8.55                                         | 1.34       |                                                                   |                                                   |
| 356                               | 10.80                                        | 1.72       | 355                               | 16.40                                        | 2.50       |                                                                   |                                                   |
| 386                               | 86.69                                        | 12.75      | 396                               | 11.98                                        | 1.64       |                                                                   |                                                   |
| 766                               | 30.28                                        | 2.25       | 771                               | -4.69                                        | -0.33      |                                                                   | Asymmetric stretching of $\text{WO}_4$ tetrahedra |
| 776                               | 8.71                                         | 0.64       | 777                               | -3.78                                        | -0.26      |                                                                   |                                                   |
| 789                               | 12.50                                        | 0.90       | 790                               | 4.96                                         | 0.34       |                                                                   |                                                   |
| 810                               | 20.31                                        | 1.42       |                                   |                                              |            |                                                                   |                                                   |
| 828                               | 21.88                                        | 1.50       | 832                               | -2.21                                        | -0.14      |                                                                   |                                                   |
| 840                               | 13.52                                        | 0.91       | 840                               | 2.97                                         | 0.19       |                                                                   |                                                   |
| 856                               | 12.32                                        | 0.82       | 857                               | -9.11                                        | -0.57      |                                                                   |                                                   |
| 863                               | 5.58                                         | 0.37       | 861                               | 1.21                                         | 0.08       |                                                                   |                                                   |
| 893                               | 7.58                                         | 0.48       | 893                               | -3.12                                        | -0.19      |                                                                   |                                                   |
| 921                               | 7.16                                         | 0.44       |                                   |                                              |            |                                                                   |                                                   |
|                                   |                                              |            | 906                               | -3.89                                        | -0.23      | Symmetric stretching of $\text{WO}_4$ tetrahedra                  |                                                   |
|                                   |                                              |            | 916                               | -2.24                                        | -0.13      |                                                                   |                                                   |
|                                   |                                              |            | 925                               | 2.78                                         | 0.16       |                                                                   |                                                   |
| 968                               | 6.35                                         | 0.37       | 970                               | -3.28                                        | -0.18      |                                                                   |                                                   |
| 982                               | -1.81                                        | -0.10      | 996                               | -4.46                                        | -0.24      |                                                                   |                                                   |
| 1016                              | 21.33                                        | 1.19       | 1010                              | 3.62                                         | 0.19       |                                                                   |                                                   |
| 1030                              | 7.03                                         | 0.39       | 1031                              | 5.28                                         | 0.28       |                                                                   |                                                   |

We use Compressibility  $0.0176 \text{ GPa}^{-1}$  for Orthorhombic Phase and  $0.0185 \text{ GPa}^{-1}$  in the table.

**Table S5** The zone center frequencies for both  $\text{HfMgW}_3\text{O}_{12}$  and  $\text{H}_2\text{O}@ \text{HfMgW}_3\text{O}_{12}$

| HfMgW <sub>3</sub> O <sub>12</sub> (cm <sup>-1</sup> ) | 1water+HfMgW <sub>3</sub> O <sub>12</sub> (cm <sup>-1</sup> ) |
|--------------------------------------------------------|---------------------------------------------------------------|
| 27.3                                                   | 29                                                            |
| 30                                                     | 34.7                                                          |
| 32                                                     | 36.4                                                          |
| 34.2                                                   | 36.9                                                          |
| 36.1                                                   | 40                                                            |
| 43                                                     | 44.3                                                          |
| 43.4                                                   | 47.4                                                          |
| 44.2                                                   | 50.9                                                          |
| 46.3                                                   | 53                                                            |
| 52.9                                                   | 56.7                                                          |
| 55.2                                                   | 58.5                                                          |
| 56.6                                                   | 60.9                                                          |
| 59.9                                                   | 62                                                            |
| 62.1                                                   | 63.3                                                          |
| 66.9                                                   | 67.1                                                          |
| 68.1                                                   | 69                                                            |
| 68.9                                                   | 70.4                                                          |
| 69.6                                                   | 71.5                                                          |
| 70.1                                                   | 72                                                            |
| 71.3                                                   | 74.3                                                          |
| 74.2                                                   | 75                                                            |
| 74.4                                                   | 77.4                                                          |
| 75.1                                                   | 79.4                                                          |
| 78                                                     | 82                                                            |
| 80.5                                                   | 83.8                                                          |
| 82                                                     | 84.3                                                          |
| 82.3                                                   | 86.5                                                          |
| 84.9                                                   | 87.9                                                          |
| 88.2                                                   | 88.6                                                          |
| 88.9                                                   | 89.4                                                          |
| 90.6                                                   | 92.1                                                          |
| 90.6                                                   | 92.3                                                          |
| 91.3                                                   | 95.3                                                          |
| 92.4                                                   | 96.4                                                          |
| 92.6                                                   | 97.4                                                          |
| 94.3                                                   | 99.8                                                          |
| 98.3                                                   | 100.8                                                         |
| 99                                                     | 104.7                                                         |
| 108.8                                                  | 109.1                                                         |
| 110.2                                                  | 113.6                                                         |
| 116.4                                                  | 116.2                                                         |
| 116.5                                                  | 118.8                                                         |
| 121.7                                                  | 123.8                                                         |



|       |       |
|-------|-------|
| 121.9 | 125.9 |
| 127.8 | 128.1 |
| 129   | 128.9 |
| 130.1 | 129.6 |
| 131.7 | 133.1 |
| 133.9 | 135.3 |
| 134.3 | 137.5 |
| 136   | 138.3 |
| 142.1 | 141.2 |
| 144.5 | 142.6 |
| 146.2 | 148.7 |
| 150.6 | 150.4 |
| 151.1 | 151.7 |
| 153.4 | 153.9 |
| 153.7 | 155.5 |
| 157.4 | 158.5 |
| 157.6 | 158.8 |
| 163   | 161.2 |
| 166.5 | 164.5 |
| 166.8 | 167   |
| 170   | 170.3 |
| 171   | 171.6 |
| 171.5 | 176.5 |
| 178.3 | 177   |
| 179   | 179   |
| 180.3 | 183.4 |
| 184.7 | 187.3 |
| 187   | 188.8 |
| 189.4 | 191.3 |
| 190.9 | 192.5 |
| 191.2 | 194.7 |
| 195.1 | 197.1 |
| 204   | 203.1 |
| 205.5 | 207.1 |
| 214.1 | 210.6 |
| 218.5 | 213.6 |
| 218.6 | 215.5 |
| 222.3 | 219.9 |
| 236.2 | 222.8 |
| 237.8 | 234.2 |
| 240.9 | 238.2 |
| 244.7 | 240.3 |
| 246.1 | 243.1 |
| 248.7 | 244   |

|       |       |
|-------|-------|
| 249.6 | 247.4 |
| 250.1 | 248.5 |
| 250.7 | 249.1 |
| 251.7 | 251.3 |
| 252   | 252.5 |
| 254.7 | 253.5 |
| 255.7 | 254.2 |
| 257   | 256.3 |
| 260.9 | 258.7 |
| 261.2 | 258.9 |
| 262.5 | 261.3 |
| 263   | 261.5 |
| 267.8 | 263.7 |
| 270.4 | 266.2 |
| 271.1 | 267.2 |
| 271.2 | 269.7 |
| 271.6 | 270.8 |
| 279.1 | 272.6 |
| 280.9 | 276.2 |
| 282.8 | 278.3 |
| 284.3 | 279   |
| 284.4 | 282.6 |
| 285.7 | 283.8 |
| 285.7 | 284.5 |
| 286.8 | 285.9 |
| 288.3 | 289   |
| 291.5 | 290.7 |
| 294.3 | 292.7 |
| 297.1 | 294   |
| 297.4 | 295.1 |
| 297.8 | 296   |
| 298.1 | 299.3 |
| 299.2 | 301   |
| 304.7 | 301.5 |
| 306.3 | 302.8 |
| 307.2 | 305.3 |
| 309.2 | 309.9 |
| 315.6 | 311.7 |
| 320.8 | 313.4 |
| 321.9 | 320.4 |
| 324.9 | 324.1 |
| 326.5 | 325.9 |
| 327.5 | 327.4 |
| 329.1 | 328.7 |

|       |       |
|-------|-------|
| 333.3 | 332.6 |
| 334.5 | 335.2 |
| 339.5 | 337.1 |
| 343.1 | 340.7 |
| 343.5 | 341.7 |
| 344.2 | 345.1 |
| 347.1 | 346.4 |
| 348.7 | 347.1 |
| 349.3 | 349.4 |
| 350.8 | 350   |
| 354.3 | 356.1 |
| 356.3 | 357.5 |
| 356.5 | 359.7 |
| 368.2 | 362.4 |
| 369   | 365.5 |
| 369.1 | 367.5 |
| 370.3 | 370.5 |
| 378.2 | 371.5 |
| 379.4 | 374.6 |
| 385.4 | 377.2 |
| 385.6 | 378.6 |
| 387.5 | 385.5 |
| 662.9 | 388.8 |
| 664.3 | 390.9 |
| 667   | 401.5 |
| 667.9 | 445.3 |
| 669.5 | 618.6 |
| 672.4 | 636.8 |
| 692.7 | 662.8 |
| 692.9 | 666   |
| 694.6 | 668.4 |
| 740   | 669.8 |
| 746.5 | 675   |
| 750.9 | 693.2 |
| 752.8 | 693.6 |
| 757.8 | 697.2 |
| 766.3 | 724.1 |
| 768.2 | 739.7 |
| 775.2 | 745.6 |
| 780.7 | 750.9 |
| 780.9 | 752.4 |
| 785.8 | 756.5 |
| 821.4 | 761   |
| 822.1 | 767   |

|       |        |
|-------|--------|
| 829.8 | 777.1  |
| 849.9 | 779.5  |
| 850.2 | 784.2  |
| 851.4 | 788.6  |
| 853.8 | 815.7  |
| 864.6 | 816.4  |
| 866.4 | 823.5  |
| 897.3 | 843.9  |
| 899.3 | 845.7  |
| 905.3 | 848.2  |
| 906.7 | 850.5  |
| 912.3 | 855.4  |
| 919.5 | 865.4  |
| 921.6 | 888.5  |
| 923.3 | 895.5  |
| 925.5 | 896.5  |
| 927.2 | 901.6  |
| 928.6 | 907.9  |
| 930.3 | 909.1  |
| 932.5 | 916.4  |
| 933.8 | 917.7  |
| 934.9 | 920.5  |
| 939.1 | 921.5  |
| 941.2 | 924.2  |
| 941.6 | 926.5  |
| 943.7 | 930.5  |
|       | 930.8  |
|       | 932.2  |
|       | 935.4  |
|       | 939.1  |
|       | 943.4  |
|       | 944.3  |
|       | 1649.1 |
|       | 3429   |
|       | 3536.3 |

---

## Details of calculations and parameters

In order to gain detailed insights into the interaction of the H<sub>2</sub>O molecule with HfMgW<sub>3</sub>O<sub>12</sub> and understand the absorption behavior of hydrated structure formation, we have performed first-principles calculations. The first-principles calculations are performed based on the density functional theory(DFT) with a generalized gradient approximation(GGA) in the form of PBE (Perdew-Burke-Ernzerhof) <sup>1</sup>implemented in the VASP<sup>2-4</sup> (Vienna *ab-initio* Simulation Package) code, including van der Waals interaction corrections in the form of DFT-D2 method of Grimme<sup>5</sup>. Valence electrons are treated explicitly and their interactions with ionic cores are described by PAW<sup>6-7</sup>(Projector Augmented Wave) pseudopotentials. The wave functions are expanded in a plane wave basis set with an energy cutoff of 500 eV. A *k*-point sampling of 3×3×2 Monkhorst-Pack grids<sup>8</sup> in the first Brillouin zone of the unitcell and a Gaussian smearing with a width of  $\sigma= 0.02$  eV is used in the calculations. The H<sub>2</sub>O@HfMgW<sub>3</sub>O<sub>12</sub> system is modeled by having one H<sub>2</sub>O molecule in a HfMgW<sub>3</sub>O<sub>12</sub> unit cell. All atoms in the unit cell are allowed to relax until the forces on each atom are smaller than 0.01 eV/Å and the energy difference is smaller than 10<sup>-8</sup> eV/atom.

## Notes and references

- 1 J. P. Perdew, K. Burke, M. Ernzerhof, *Phys. Rev. Lett.* 1996, **77**, 3865-3868
- 2 G. Kresse,; J. Furthmüller, *Comput. Mater. Sci.* 1996, **6**, 15-50
- 3 G. Kresse,; J. Hafner, *Phys. Rev. B* 1993, **47**, 558-561
- 4 G.Kresse, J. Furthmüller, *Phys. Rev. B* 1996, **54**, 11169-11186
- 5 S. Grimme, *J. Comput. Chem.* 2006, **27**, 1787-1799
- 6 P. E.Blöchl, *Phys. Rev. B* 1994, **50**, 17953-17979
- 7 G. Kresse, D. Joubert, *Phys. Rev. B* 1999, **59**, 1758-1775
- 8 H. J. Monkhorst, J. D. Pack, *Phys. Rev. B* 1976, **13**, 5188-5192
